**Short tandem repeats with massive variation and functional consequences  
across strains of *Arabidopsis thaliana*.**

Maximilian O. Press<sup>1</sup>, Rajiv C. McCoy<sup>1</sup>, Ashley N. Hall<sup>2</sup>, Joshua Akey<sup>1</sup>, and Christine Queitsch<sup>1\*</sup>

1: University of Washington Department of Genome Sciences, Seattle, WA

2: University of Washington Department of Molecular and Cellular Biology, Seattle, WA

\*: to whom correspondence should be addressed: queitsch@uw.edu

**Keywords:** Short tandem repeat, microsatellite, quantitative genetics, selection,  
*Arabidopsis thaliana*.

## Abstract

Short tandem repeat (STR) mutations may be responsible for more than half of the mutations in eukaryotic coding DNA, yet STR variation is rarely examined as a contributor to complex traits. We assess the scope of this contribution across a collection of 96 strains of *Arabidopsis thaliana* by massively parallel STR genotyping. 95% of examined STRs are polymorphic, and the median STR has six alleles. Modest STR expansions are found in most strains, some of which have evident functional effects. For instance, three of six intronic STR expansions are associated with intron retention. We infer selective constraint on STRs, and find the strongest signatures of purifying selection on coding STRs. Lastly, we detect dozens of novel STR-phenotype associations that could not be detected with SNPs, and validate some experimentally. Our results demonstrate that STRs comprise a large unascertained reservoir of functionally relevant genomic variation.

## Introduction

Mutation rates vary within a genome by several orders of magnitude<sup>1</sup>, from  $\sim 10^{-8}$ - $10^{-9}$  for substitutions to  $10^{-3}$ - $10^{-4}$  on average for short tandem repeats (STRs)<sup>2-4</sup>. STR mutations occur through addition or subtraction of repeat units. Given the prevalence of STR loci in eukaryotic genomes, we would expect more *de novo* STR mutations than single nucleotide substitutions in the human genome per generation<sup>4</sup>, even in coding regions<sup>5</sup>. Thus, while the overall mutation rate is under strong control from natural selection, some loci experience many more mutations than others<sup>6</sup>. The existence of such highly mutable loci contradicts the commonly-used infinite sites model<sup>7</sup>, which assumes that no locus mutates more than once in a population; it further poses complications for quantitative genetic models that assume contributions from many independent loci<sup>8</sup>.

In spite of the large effect that STRs can have on complex traits and diseases in model organisms and humans<sup>9-11</sup>, their variation is largely not considered in genotype-phenotype association studies due to technical obstacles. However, STR genotyping methods of sufficient accuracy, throughput, and cost-effectiveness to ascertain STR

Press *et al.* (2017)

Massive variation of STRs in *A. thaliana*

alleles at high throughput have recently become available<sup>12–14</sup>. Studies leveraging these methods suggest considerable contributions of STRs to heritable phenotypic variation<sup>12,15</sup>.

From an evolutionary perspective, the high mutation rate and clear phenotypic effects of STRs are speculated to provide readily accessible evolutionary paths for rapid adaptation<sup>16–18</sup>. On larger time scales, the presence of STRs with high mutation rates in coding regions appears to be maintained by selection<sup>19–21</sup>. These observations independently argue for important functional roles of STRs.

In the present study, we apply massively parallel STR genotyping to a diverse panel of well-characterized *A. thaliana* strains. We use these data to generate and test hypotheses about the functional effects of STR variation, combining observations of gene disruption by STR expansion, inferences about STR conservation, and phenotypic association analyses with follow-up experiments. Based on our results, we argue that STRs must be included in any comprehensive account of phenotypically relevant genomic variation.

## Results

*STR genotyping reveals complex allele frequency spectra.*

We targeted 2,050 STR loci for genotyping with molecular inversion probes (MIPs)<sup>12</sup> across a core collection of 96 *A. thaliana* strains (Methods). These loci were all less than 200bp in size and had nucleotide purity of at least 90%, encompassing nearly all gene-associated STRs and ~40% of intergenic STRs (Fig. 1a). We used comparisons with the Col-0 reference genome, PCR analysis of selected STRs, and dideoxy sequencing to estimate that MIP STR genotype calls were ~95% accurate, and inaccurate calls were generally only one to two units away from the correct copy number (Supplementary Note, Supplementary Fig. 1-4, Supplementary Table 1).

Press *et al.* (2017)

# Massive variation of STRs in *A. thaliana*

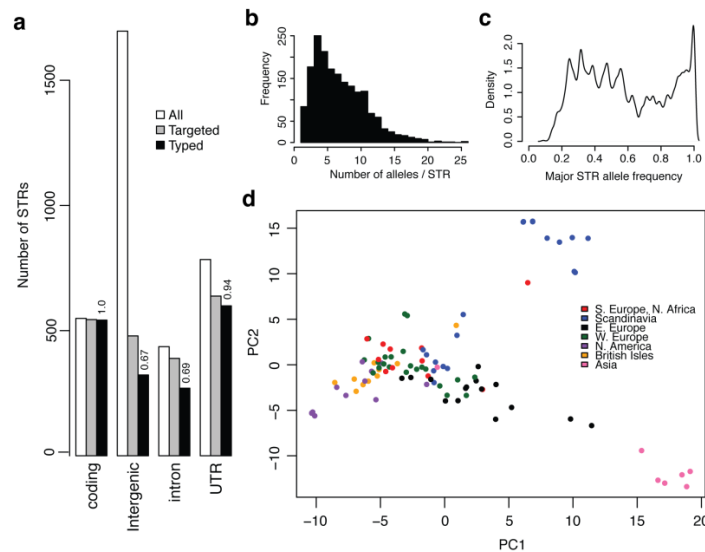

**Figure 1. STRs in *A. thaliana* show a complex allele frequency distribution and geographic differentiation.** (a): Distribution and ascertainment of STR loci. “All”: all STRs matching the definition of STRs for this study, *e.g.*  $\leq 180$  bp length in TAIR10,  $\geq 89\%$  purity in TAIR10, 2-10 bp nucleotide motif. “Targeted”: the 2050 STRs targeted for MIP capture. “Typed”: STRs successfully genotyped in the Col-0 genome in a MIPSTR assay. Numbers above bars indicate the proportion of targeted STRs in the relevant category that were successfully genotyped. (b): The distribution of allele counts across all genotyped STRs. (c): The distribution of major allele frequencies (frequency of the most frequent allele at each locus) across genotyped STRs. (d): Principal component analysis (PCA) reveals substantial geographic structure according to STR variation. PC1 and PC2 correspond, respectively, to 5.2% and 4.0% of total STR allele variance.

95% of STRs were polymorphic. Most STRs were highly multiallelic (Fig. 1b; mean=6.4 alleles, median=6 alleles), and this variation was mostly unascertained by the 1001 Genomes resource for *A. thaliana* (Supplementary Fig. 3a). Coding STRs were only slightly less polymorphic (mean=4.5 alleles, median=4 alleles), though whether this difference is due to selection or to mutation rate variation is unclear. 45% of STRs had a major allele with frequency  $< 0.5$ , confusing the familiar concepts of major and minor alleles, which have provided a common framework for detecting genotype associations (Fig. 1c). Specifically, the Col-0 reference strain carries the major STR allele at only 48% of STR loci. Moreover, rarefaction analysis implied that more STR alleles at these loci are expected with further sampling of *A. thaliana* strains (Supplementary Fig. 4c).

Principal component analysis of STR variation revealed genetic structure corresponding to Eurasian geography (Fig. 1d, Supplementary Fig. 5), consistent with previous

Press *et al.* (2017)

Massive variation of STRs in *A. thaliana*

1 observations that population structure is associated with geography in *A. thaliana*<sup>22,23</sup>.

2 This result, which agrees with previous observations from a much larger set of genome-  
3 wide single nucleotide polymorphism markers, shows that a comparatively small panel  
4 of STRs suffices to capture detailed population structure in *A. thaliana*. Overall, we find  
5 that STRs are extremely allele-rich, and their variation reflects expected population  
6 structure.

7 *Novel STR expansions are associated with splice disruptions.*

8 We next examined the frequency and functional consequences of STR expansions in *A.*  
9 *thaliana*. STR expansions, extreme high-copy-number variants of comparatively short  
10 STRs, are widely recognized as contributing to human disease<sup>24</sup> and other  
11 phenotypes<sup>25</sup>. While large (>150 bp) expansions are difficult to infer, we detected  
12 modest STR expansions with a simple heuristic comparing the longest allele observed  
13 at each locus to the median allele (Fig. 2a). We found expansions in 64 of 96 *A. thaliana*  
14 strains, each carrying at least one expanded STR allele from one of 28 expansion-prone  
15 STRs (9 coding, 6 intronic, 8 UTR, 5 intergenic). Most expansions were found in  
16 multiple strains (Fig. 2b), although expansion frequency was likely underestimated due  
17 to a higher rate of missing data at these loci. STR expansions causing human disease  
18 can be as small as 25 copies<sup>24</sup>, whereas we detected expansions up to ~50 copies.

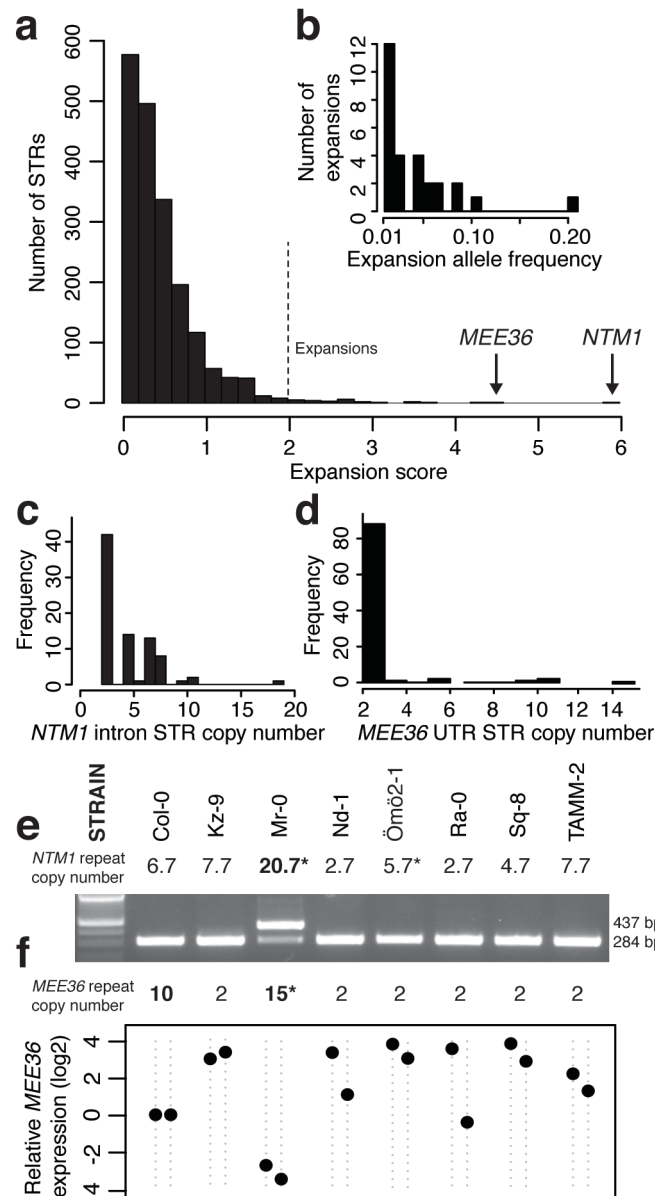

**Figure 2. Inferring and assessing the functional effects of modest STR expansions.** (a): The distribution of expansion scores across STRs, where the expansion score is computed as  $(\max(\text{STR length}) - \text{median}(\text{STR length})) / \text{median STR length}$ . We called any STRs with a score greater than 2 a modest expansion (indicated). (b): Distribution of allele frequencies of the 28 expanded STR alleles. (c, d): Distribution of STR copy number of the intronic STR in the *NTM1* gene and the 3' UTR STR in the *MEE36* gene. (e): RT-PCR demonstrates intron retention in *NTM1* mRNA in the Mr-0 strain, which carries the STR expansion, yielding an aberrant 437-bp product. (f): *MEE36* transcript abundances measured by qRT-PCR and normalized relative to *UBC21* transcript levels. For each strain, two independent biological replicates are shown as points. Transcript levels are expressed relative to Col-0 levels (set to 1). \*: STR genotype corrected by dideoxy sequencing. Strains and order are the same between (e) and (f).

We assayed the effects of STR expansions on expression of associated genes. The

Press *et al.* (2017)

Massive variation of STRs in *A. thaliana*

most dramatic expansions (with large relative copy number increase) affected an intronic STR in the *NTM1* gene (Fig. 2c; five other expansions also resided in introns) and a STR in the 3' UTR of the *MEE36* gene (Fig. 2d). These genes, respectively, have roles in cell proliferation and embryonic development. Intronic STR mutations can disrupt splicing, causing altered gene function<sup>26</sup> and human disease<sup>27</sup>. Therefore, we assayed effects on splicing of all six expanded intronic STRs. In three cases, the expanded allele was associated with partial or full retention of its intron (Supplementary Fig. 6, Supplementary Note), including the major *NTM1* splice form in the Mr-0 strain (Fig. 2e). We confirmed intron retentions by dideoxy sequencing of cDNA (Supplementary Fig. 7a). Retention of the *NTM1* intron is predicted to lead to a nonsense mutation truncating most of the NTM1 protein (Supplementary Fig. 7b). For the other two retentions, more complex and STR allele-specific mRNA species were formed (Supplementary Fig. 6, Supplemental Text). The *MEE36* STR expansion alleles were associated with dramatically reduced *MEE36* transcript levels (Fig. 2f), possibly due to the STR expansion altering transcript processing<sup>28</sup>. These examples emphasize the potential for previously unascertained STR variation to modify gene function. Moreover, considering STR allele frequency distributions, as we did here by focusing on outliers, enables predictions about STR functional effects.

### *Signatures of functional constraint on STR variation.*

Using our observed STR allele frequency distributions, we next attempted to infer selective processes acting on STRs. Previous models for evaluating functional constraint on STRs are few<sup>29</sup>, though there is consensus that selection affects STR variation<sup>17,19,29,30</sup>. Naively, we would expect that coding STRs should show increased constraint (lower variation). Consistent with this expectation, we observed that most invariant STRs are coding (53 of 84 invariant STRs genotyped across at least 70 strains; odds ratio = 4.5,  $p = 5 \times 10^{-11}$ , Fisher's Exact Test). However, methods of inferring selection by allele counting are confounded by population structure and by mutation rate, which varies widely across STRs in this (Fig. 3a) and other studies<sup>3,31</sup>.

1 Therefore, to account for mutation rate and population structure, we used support vector  
2 regression (SVR) to predict STR variability across these 96 strains, using well-  
3 established correlates of STR variability (*e.g.* STR unit number and STR purity; Online  
4 Methods)<sup>3,32,33</sup>. Selection was defined as deviation from expected variation of a neutral  
5 STR among strains. We trained SVRs on the set of intergenic STRs, which should  
6 experience minimal selection relative to STRs associated with genes (Supplementary  
7 Fig. 8-10). We used bootstrap aggregation of SVR models to compute a putative  
8 constraint score for each STR by comparing its observed variability to the expected  
9 distribution from bootstrapped SVR models (Fig. 3b, Supplementary Note,  
10 Supplementary File 1).

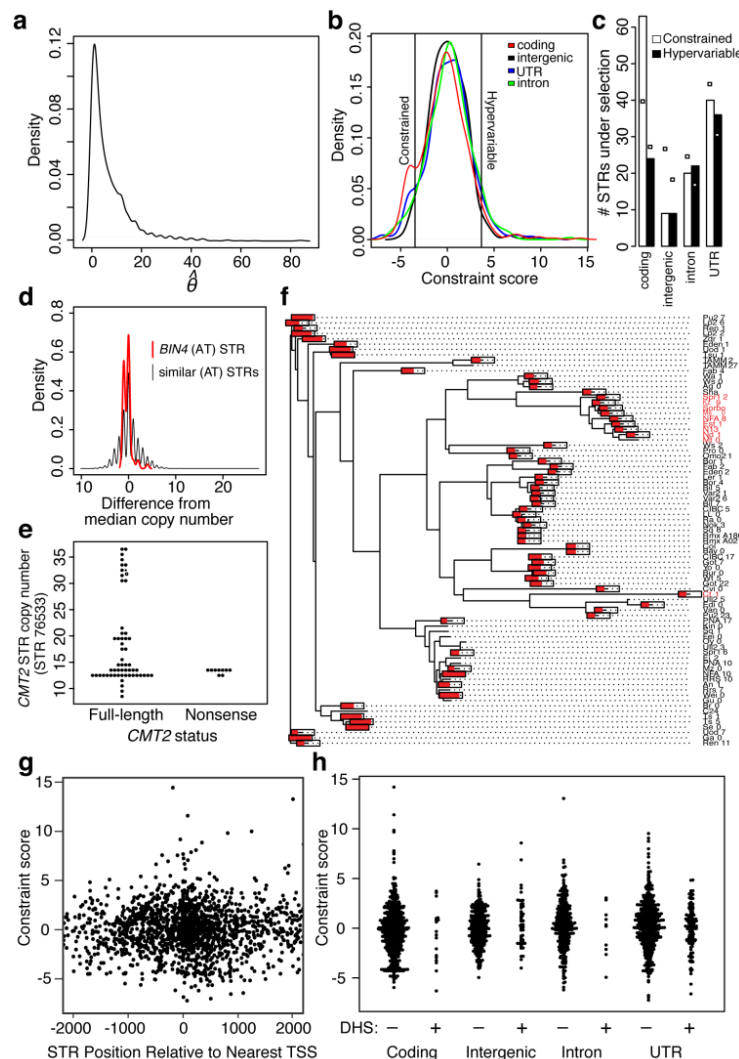

**Figure 3. Detecting functionally constrained STRs.** (a): The distribution of  $\hat{\theta}$  (estimated



Press *et al.* (2017)

Massive variation of STRs in *A. thaliana*

mutation rate<sup>7</sup>) across all genotyped STR loci. (b): Distribution of “selection scores” across all STRs, separated by locus category. Vertical lines indicate 2.5% and 97.5% quantiles of the distribution of intergenic STRs, which are used as thresholds for putative constraint and hypervariability respectively. (c): Constrained or hypervariable STRs separated by locus category. White boxes indicate the expected numbers for each bar, based on number of STRs in each locus category and number of STRs under different types of selection. (d): *BIN4* intron STR is constrained relative to similar STRs. Allele frequency spectra are normalized by subtracting the median copy number (9 for the *BIN4* STR). All pure STRs with TA/AT motifs and a median copy number between 7 and 12 are included in the “similar STRs” distribution. (e): Lack of association between near-expansion *CMT2* STR alleles and previously described nonsense mutations. (f): Neighbor-joining tree of a 10KB region of *A. thaliana* chromosome 4 encompassing the *CMT2* gene across 81 strains with available data. Tip labels in red carry an adaptive nonsense mutation early in the first exon of *CMT2*, as noted previously<sup>41</sup>. Red bars drawn on tips of the tree indicate the length of the *CMT2* intronic STR (as a proportion of its maximum length, 36.5 units). The bars are omitted for tips with missing STR data. (g): Constraint score from (b) plotted with respect to nearest TSS. (h): Constraint score from (b) plotted with respect STR annotations.

According to constraint scores, 132 STRs were less variable than expected, suggesting purifying selection on these loci (Fig. 3c). Among these, 63 STRs were coding (OR = 2.4,  $p = 3.7 \times 10^{-6}$ , Fisher’s Exact Test); this enrichment of coding STRs among constrained STRs agrees with our naïve analysis of invariant STRs above. Examples of constrained coding STRs included STRs encoding homologous polylysines in three different histone H2B proteins. Generally, coding STRs showing purifying selection encoded roughly half as many polyserines and twice as many acidic homopolymers as expected from the *A. thaliana* proteome (Supplementary Table 3)<sup>34</sup>. Although many more coding STRs are probably functionally constrained, our power to detect such constraints is limited by the size of the dataset. We also observed high conservation of some STRs in non-coding regions, though this is less interpretable given the ambiguous relationship between sequence conservation and regulatory function in *A. thaliana*<sup>35</sup>. The most constrained intronic STR, in the *BIN4* gene, which is required for endoreduplication and normal development<sup>36</sup>, shows a restricted allele frequency spectrum compared to similar STRs (Fig. 3d).

Hypervariable coding STRs (showing more alleles than expected) were too few for statistical arguments, but nonetheless showed several notable patterns (Supplementary

Press *et al.* (2017)

Massive variation of STRs in *A. thaliana*

Note, Supplementary Fig. 11). For example, 3/24 hypervariable coding STRs encoded polyserines in F-box proteins, suggesting that STR variation may serve as a mechanism of diversification in this protein family, which shows dramatically increased family size and sequence divergence in some plant lineages<sup>37,38</sup>. One non-coding hypervariable STR was associated with the *Chromomethylase 2* (*CMT2*) gene, which is under selection in *A. thaliana*<sup>39</sup>. Specifically, *CMT2* nonsense mutations in some populations are associated with temperature seasonality. We considered whether the extreme *CMT2* STR alleles might be associated with these nonsense mutations. Instead, these extreme alleles exclusively occurred in strains with full-length *CMT2* (Fig. 3e). Strains with the common *CMT2* nonsense mutation form a tight clade in the *CMT2* sequence tree, whereas the *CMT2* STR length fluctuates rapidly throughout the tree and appears to converge on longer alleles independently in different clades (Fig. 3f). These convergent changes are consistent with a model in which the *CMT2* STR is a target of selection.

We further assessed whether STR conservation can be attributed to *cis*-regulatory function. The abundance of STRs in eukaryotic promoters<sup>40</sup>, and their associations with gene expression (in *cis*)<sup>15,41</sup>, have suggested that STRs affect transcription, possibly by altering nucleosome positioning<sup>41</sup>. We examined whether STRs near transcription start sites (TSSs) showed signatures of functional constraint (Fig. 3g). We found little evidence for reduced STR variation near TSSs, suggesting that *cis*-regulatory effects do not generally constrain STR variation. Moreover, we found no relationship between putative constraint and whether STRs reside in accessible chromatin sites marking regulatory DNA (Fig. 3h).

*STRs yield numerous novel genotype-phenotype associations.*

We next addressed whether STR genotypes contribute new information for explaining phenotypic variation. It is often assumed that STR phenotype associations should be captured through linkage to common single nucleotide polymorphisms (SNPs)<sup>42</sup>. This assumption is inconsistent with available data. Human STR data<sup>42,43</sup> and simulation

Press *et al.* (2017)

Massive variation of STRs in *A. thaliana*

studies<sup>44</sup> indicate decreased linkage disequilibrium (LD) between STRs and SNPs, making it uncertain whether SNP markers can meaningfully tag STR genotypes. Indeed, we found little evidence of LD between STR and SNPs in *A. thaliana* (Fig. 4a). Moreover, the observed LD around STR loci declined with increasing STR allele number (Supplementary Fig. 12), consistent with an expected higher mutation rate at multiallelic loci<sup>7,44</sup>. This result suggests that STR-phenotype associations need to be directly tested rather than relying on linkage to SNPs. *A. thaliana* offers extensive high-quality phenotype data for our inbred strains, which have been previously used for SNP-based association studies<sup>45</sup>. We tested each polymorphic STR for associations across the 96 strains with each of 105 published phenotypes. For the subset of 32 strains for which RNA-seq data were available<sup>46</sup>, we also tested for associations between STR genotypes and expression of genes within 1MB (*i.e.*, eQTLs; Supplementary Note). Although our power to detect eQTLs was limited by sample size, we detected 12 associations. The strongest association was between a STR residing in long noncoding RNA gene *AT4G07030* and expression of the nearby stress-responsive gene *AtCPL1* (Supplementary Fig 13, Supplementary Table 4).

We next focused on organismal phenotypes. Certain STRs showed associations with multiple phenotypes, and flowering time phenotypes were particularly correlated with one another (Fig. 4c,d). Similar to these patterns, SNPs have also shown associations with multiple phenotypes, and correlated flowering time phenotypes are among the strongest associations in the same strains<sup>45</sup>. As in previous association studies using STRs<sup>15</sup>, some inflation was apparent in test p-values compared to expectations, though the same tests using permuted STR genotypes showed negligible inflation (Fig. 4b, Supplementary Fig 14). Negligible inflation with permuted genotypes has been used previously to exclude confounding from population structure<sup>15</sup>, which we will also presume here (Supplementary Note). We found 137 associations between 64 STRs and 25 phenotypes at stringent genome-wide significance levels (Methods; Supplementary Table 5). Given the low LD observed between STRs and other variants, STRs are likely to be the causal variants, rather than merely tagging them. Our analysis found plausible

Press *et al.* (2017)

Massive variation of STRs in *A. thaliana*

candidate genes, such as *COL9*, which acts in flowering time pathways and contains a flowering time-associated STR, and *RABA4B*, which acts in the salicylic acid defense response<sup>47</sup> and contains a STR associated with lesion formation.

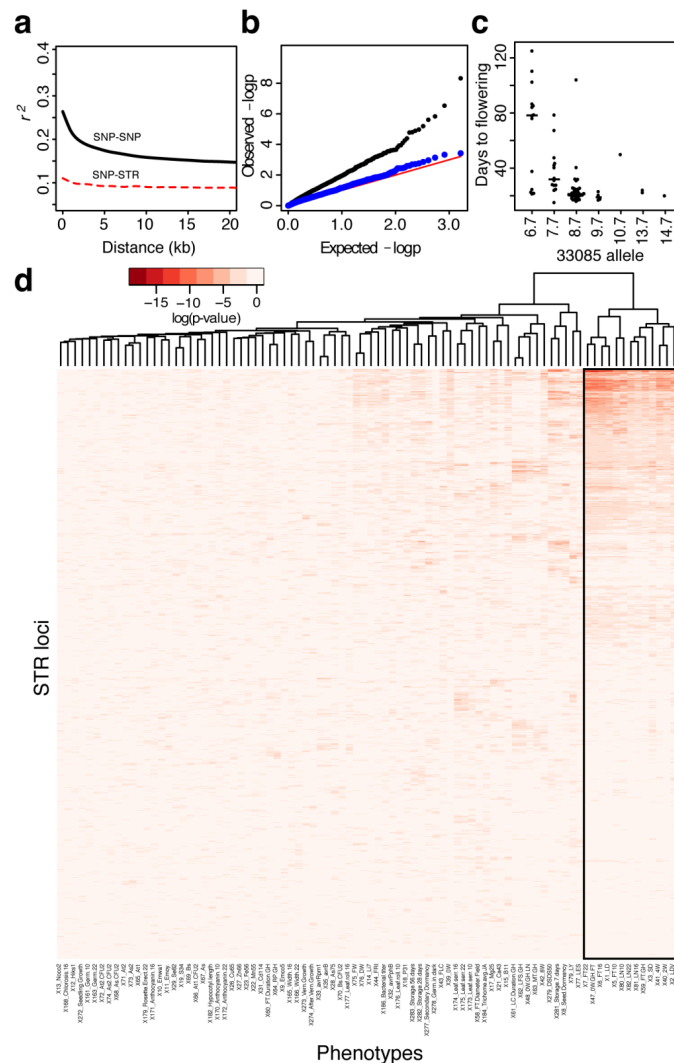

**Figure 4. Diverse associations of STRs with quantitative phenotypes.** (a): Multi-allelic LD<sup>64</sup> estimates for STR and SNP loci. Lowess lines for each category are plotted. All values of  $r^2 < 0.05$  are omitted from lowess calculation for visualization purposes. (b): Quantile-quantile plot of p-values from tests of association between STRs and germination rate after 28 days of storage. (c): An example association between an STR (33085) and a phenotype (flowering time in long days after 4 weeks vernalization) in *A. thaliana* strains. Median of each distribution is indicated by a bar proportional in width to the number of observations. (d): Heatmap showing pairwise associations between STRs and phenotypes, summarized by the p-value from a linear mixed model, fitting STR allele as a fixed effect and kinship as a random effect. Both rows and columns are clustered, though the row dendrogram was omitted for clarity. STRs with genotype

Press *et al.* (2017)

Massive variation of STRs in *A. thaliana*

information in fewer than 25 strains are not displayed. Flowering time phenotypes are boxed in black.

We evaluated whether these associations might have been found using SNP-based analyses, and whether STR effects are large enough to be meaningful. We found that STR effects on phenotype are largely not accounted for by nearby SNP variation. Considering the strongest association for each STR, only 18 of the 64 STRs were near potentially confounding SNP variants, and most associations (14/18) were robust to adjustment for nearby SNP genotypes<sup>45</sup> (Supplementary Table 6, Supplementary Note). One notable exception was an STR closely linked to a well-known deletion of the *RPS5* gene in a hypervariable region of chromosome 1<sup>48</sup> that causes resistance to bacterial infection<sup>49</sup>. *RPS5* status is under balancing selection in *A. thaliana*<sup>48</sup>. In this case, the association and the linkage are apparently strong enough (the STR is ~4KB upstream of the deletion) that this STR tags *RPS5*'s effect on infection. The observation of a STR tagging a hypervariable region leads us to speculate that STR variation holds information about genomic regions with complex mutational histories.

To assess the STR contribution to the variance of a specific trait, we performed a naïve variance decomposition of the long-day flowering phenotype into SNP and STR components, as represented by the loci showing associations with this trait. Our results suggested that STRs potentially contribute as much or more variance than SNPs to this phenotype (Supplementary Note, Supplementary Table 7). Estimated effect sizes for STR variants on this phenotype were similar to those of large-effect SNP variants<sup>45</sup> (Supplementary Fig 15).

Finally, we used mutant analysis to evaluate the two strongest flowering time associations, a coding STR in *AGL65* and an intronic STR in the uncharacterized gene *AT4G01390*; neither locus had been associated with flowering time phenotypes. We found that disruptions of both STR-associated genes had modest early flowering phenotypes (by ~2 days and ~1 rosette leaf,  $p < 0.05$  for each in linear mixed models; Supplementary Fig 16), supporting the robustness of our STR-phenotype associations.

Press *et al.* (2017)

Massive variation of STRs in *A. thaliana*

1 Taken together, our study suggests that STRs contribute substantially to phenotypic  
2 variation.

### 3 **Discussion**

4 Our results imply that STRs contribute substantially to trait heritability in *A. thaliana*. Far  
5 from being “junk DNA”, STRs are apparently constrained by functional requirements,  
6 STR variation can disrupt gene function, and is associated with phenotypic variation.  
7 Considering that STR variation is represented only poorly through linkage to nearby  
8 SNPs, STRs likely contribute to the missing heritability of complex traits.

9 STRs are particularly relevant to the phenotypic variance due to *de novo* mutations  
10 ( $V_m$ ). Estimates of  $V_m$  from model organisms are on the order of 1%, but may vary  
11 substantially from trait to trait<sup>50</sup>. STRs are good candidates for a substantial proportion  
12 of this variance, given their high mutation rate, residence in functional regions, and their  
13 functional constraint observed here. In previous work<sup>51</sup>, we showed apparent copy  
14 number conservation of a STR in spite of a high mutation rate. In this case, deviation  
15 from the conserved copy number produced aberrant phenotypes. Our observation that  
16 constrained STRs are common suggests that STRs are a likely source of deleterious *de*  
17 *novo* mutations which are removed by selection.

18 The extent to which STRs affect phenotype is only partially captured in this study.  
19 Specifically, we assayed two STRs shown to cause phenotypic variation in prior  
20 transgenic *A. thaliana* studies<sup>25,52</sup>, but these STR loci did not show strong signatures of  
21 phenotypic association or of selection. This lack of ascertainment suggests that many  
22 more functionally important STRs exist in *A. thaliana* than we can detect with the  
23 analyses presented here. For example, the polyQ-encoding STR in the *ELF3* gene  
24 causes dramatic variation in developmental phenotypes<sup>52</sup>, yet we find no statistical  
25 associations between this locus and phenotype across our 96 strains. In this case the  
26 lack of phenotype association is expected; *ELF3* STR alleles interact epistatically with  
27 several loci<sup>53</sup> and associations are thus difficult to detect. Indeed, we have argued that  
28 STRs are more likely than less mutable classes of genomic variation to exhibit



Press *et al.* (2017)

Massive variation of STRs in *A. thaliana*

epistasis<sup>9</sup>. In consequence, we expect that the associations described in the present study are an underestimate of STR effects on phenotype. Moreover, our data are constrained by MIP technology, which limits the size and composition of STR alleles that we can ascertain (Figure 1a, Supplementary Figures 1-2).

Considering next a mechanistic perspective, the association we observe between intronic STR expansions and splice disruptions may be an important mechanism by which STRs contribute to phenotypic variation. In humans, unascertained diversity of splice forms contributes substantially to disease<sup>54</sup>, and this diversity is larger than commonly appreciated<sup>55</sup>. We demonstrate that this mechanism is common at least for expansions; future work should evaluate how tolerant introns are to different magnitudes of STR variation, as these effects on protein function may prove to be both large and of relatively high frequency. The phenotypic contributions of loci with high mutation rate remain underappreciated, specifically in cases where such loci are difficult to ascertain with high-throughput sequencing. The results presented here argue that STRs are likely to play a substantial role in phenotypic variation and heritability. Accounting for the heterogeneity of different classes of genomic variation, and specifically variation in mutation rate, will advance our understanding of the genotype-phenotype map and the trajectory of molecular evolution.

## METHODS

### ONLINE METHODS

#### Probe design

We used TRF<sup>56</sup> (parameters: matching weight 2, mismatching penalty 5, indel penalty 5, match probability 0.8, indel probability 0.1, score  $\geq 40$  and maximum period 10) to identify STRs in the TAIR8 build of the *Arabidopsis thaliana* genome, identifying 7826 putative STR loci under 200bp (Supplementary File 2). We restricted further analysis to the 2409 loci with repeat purity  $\geq 89\%$ . We chose 2307 STRs from among these, prioritizing STRs in coding regions, introns, or untranslated regions (UTRs), higher STR unit purity, and expected variability (VARscore<sup>32</sup>). We designed<sup>57</sup> molecular inversion

Press *et al.* (2017)

Massive variation of STRs in *A. thaliana*

probes (MIPs) targeting these STR loci in 180bp capture regions with 8bp degenerate tags in the common MIP backbone. For this purpose, we converted STR coordinates to the TAIR10 build and used the TAIR10 build as a reference genome. We used single nucleotide variants (SNVs) in 10 diverse *Arabidopsis thaliana* strains<sup>58</sup> to avoid polymorphic sites in designing MIP targeting arms. We filtered out MIPs predicted to behave poorly (MIPGEN logistic score < 0.7), discarded MIPs targeting duplicate regions, and substituted MIPs designed around SNVs as appropriate. We attempted to re-design filtered MIPs with 200bp capture regions using otherwise identical criteria. This yielded a final set of 2050 STR-targeting MIP probes (Supplementary File 3).

### MIP and library preparation

These 2050 probes were ordered from Integrated DNA Technologies as desalted DNAs at the 0.2 picomole scale and resuspended in Tris-EDTA pH 8.0 (TE) to a concentration of 2  $\mu$ M and stored at 4° C. We pooled and diluted probes to a final stock concentration of 1 nM. We phosphorylated probes as described previously<sup>59</sup>. We performed DNA preparation from whole aerial tissue of adult *A. thaliana* plants. We prepared MIP libraries essentially as described previously<sup>12,59</sup> using 100 ng *A. thaliana* genomic DNA for each of 96 *A. thaliana* strains.

### Sequencing

We sequenced pooled capture libraries essentially as previously described<sup>12</sup> on NextSeq and MiSeq instruments collecting a 250bp forward read sequencing the ligation arm and captured target sequence, an 8bp index read for library demultiplexing, and a 50bp reverse read sequencing the extension arm and degenerate tag for single-molecule deconvolution. In each run, 10% of the sequenced library pool consisted of high-complexity whole-genome library to increase sequence complexity. For statistics and further details of data acquired for each library see Supplementary Tables 8 and 9.

### STR annotation



Press *et al.* (2017)

Massive variation of STRs in *A. thaliana*

We annotated STRs according to Araport11<sup>60</sup>, classifying all STRs as coding, intronic, intergenic, or UTR-localized, and indicating whether each STR overlapped with transposable element sequence. To identify regulatory DNA, we used the union of seven distinct DNaseI-seq experiments<sup>61</sup> covering pooled or isolated tissue types. For additional details, see the Supplementary Note.

## Sequence analysis

Sequences were demultiplexed and output into FASTQ format using BCL2FASTQ v2.17 (Illumina, San Diego). We performed genotype calling essentially as described previously<sup>12</sup>, with certain modifications (Supplementary Note, Supplementary Table 1). Note that our *A. thaliana* strains are inbred, and more stringent filters and data processing would be necessary to account for heterozygosity. For information about comparison with the Bur-0 genome, see the Supplementary Note. Updated scripts implementing the MIPSTR analysis pipeline used in this study are available at [https://osf.io/mv2at/?view\\_only=d51e180ac6324d2c92028b2bad1aef67](https://osf.io/mv2at/?view_only=d51e180ac6324d2c92028b2bad1aef67).

## Statistical analysis and data processing

We performed all statistical analysis and data exploration using R v3.2.1<sup>62</sup>. For plant experiments, we fit mixed-effects models using Gaussian (flowering) or binomial generalized linear models using experiment and position as random effects and genotype as a fixed effect.

## STR expansion inference

We inferred STR expansions where the maximum copy number of an STR is at least three times larger than the median copy number of that STR. Various alleles of STR expansions were inspected manually in BAM files. Selected cases were dideoxy-sequenced and analyzed as described.

## Plant material and growth conditions

Press *et al.* (2017)

Massive variation of STRs in *A. thaliana*

Plants were grown on Sunshine soil #4 under long days (16h light : 8h dark) at 22°C under cool-white fluorescent light. T-DNA insertion mutants were obtained from ABRC<sup>63</sup> (Supplementary Table 11). For flowering time experiments, plants were grown in 36-pot or 72-pot flats; days to flowering (DTF) and rosette leaf number at flowering (RLN) were recorded when inflorescences were 1cm high. Results are combined across at least three experiments.

## Gene expression and splicing analysis

We grew bulk seedlings of indicated strains on soil for 10 days, harvested at Zeitgeber time 12 (ZT12), froze samples immediately in liquid nitrogen, and stored samples at -80°C until further processing. We extracted RNA from plant tissue using the SV RNA Isolation kit (including DNase step; Promega, Madison, WI), and subsequently treated it with a second DNase treatment using the Turbo DNA-free kit (Ambion, Carlsbad, CA). We performed cDNA synthesis on ~500ng RNA for each sample with oligo-dT adaptors using the RevertAid kit (ThermoFisher, Carlsbad, CA). We performed PCR analysis of cDNA with indicated primers (Supplementary Table 10) and ~25 ng cDNA with the following protocol: denaturation at 95° 5 minutes, then 30 cycles of 95° 30 seconds, 55° 30 seconds, 72° 90 seconds, ending with a final extension step for 5 minutes at 72°. We gel-purified and sequenced electrophoretically distinguishable splice variants associated with STR expansions. Each RT-PCR experiment was performed at least twice with different biological replicates.

## Population genetic analyses

For PCA, STRs with missing data across the 96 strains were omitted, leaving 987 STRs with allele calls for every strain.  $\hat{\theta}$  was estimated using the approximation  $\hat{\theta} = \frac{1}{8\bar{X}^2} - 0.5$ ,<sup>7</sup> where  $\bar{X}$  is the average frequency of all STR alleles at a locus. We computed multiallelic linkage disequilibrium estimates for SNP-SNP and SNP-STR locus pairs using MCLD<sup>64</sup>. We downloaded array SNP data for the same lines (TAIR9 coordinates) from [http://bergelson.uchicago.edu/wp-content/uploads/2015/04/call\\_method\\_75.tar.gz](http://bergelson.uchicago.edu/wp-content/uploads/2015/04/call_method_75.tar.gz)<sup>65</sup>. For each locus, both SNP and STR,

Press *et al.* (2017)

Massive variation of STRs in *A. thaliana*

we computed linkage disequilibrium scores with 150 surrounding loci. To facilitate comparison, we computed lowess estimates of linkage only for those locus pairs in the plotted distance window in each case, and only for locus pairs with  $r^2 > 0.05$ .

## Inference of conservation

STRs typed across 70 *A. thaliana* strains or fewer were dropped from this analysis, as the estimates of their variability were unlikely to be accurate, leaving 1825 STRs. We measured STR variation as the base-10 logarithm of the standard deviation of STR copy number (Supplementary Note). We used bootstrap aggregation (“bagging”) to describe a distribution of predictions as follows. An ensemble of 1000 support vector regression (SVR, fit using the *ksvm()* function in the kernlab package<sup>66</sup>) models was used to predict expected neutral variation of each STR as quantified by each measure (Supplementary Note). We used this distribution of bootstrapped predictions for intergenic STRs to compute putative conservation scores (Z-scores) for each STR. Scores below the 2.5% ( $Z < -3.46$ ) and above the 97.5% ( $Z > 3.65$ ) quantiles of intergenic STRs were considered to be putatively constrained and hypervariable respectively.

## eQTL inference

We downloaded normalized transcriptome data for *A. thaliana* strains from NCBI GEO GSE80744<sup>46</sup>. We used the Matrix eQTL package<sup>67</sup> to detect associations, fitting also 10 principal components from SNP genotypes to correct for population structure. Following precedent<sup>15</sup>, we fitted additive models assuming that STR effects on expression would be a function of STR copy number. We used Kruskal-Wallis rank-sum tests to test the null hypothesis of no association following correction.

## Genotype-phenotype associations

We downloaded phenotype data from [https://github.com/Gregor-Mendel-Institute/atpolydb/blob/master/miscellaneous\\_data/phenotype\\_published\\_raw.tsv](https://github.com/Gregor-Mendel-Institute/atpolydb/blob/master/miscellaneous_data/phenotype_published_raw.tsv). We followed precedent<sup>45</sup> in log-transforming certain phenotypes. In all analyses we treated

Press *et al.* (2017)

Massive variation of STRs in *A. thaliana*

STRs as factorial variables (to avoid linearity assumptions) in a linear mixed-effect model analysis to fit STR allele effects on phenotype as fixed effects while modeling the identity-by-state kinship matrix between strains (computed from SNP data) as a correlation structure for strain random effects on phenotype. We performed this modeling using the *lme4* function from the *coxme* R package<sup>68</sup>. We repeated every analysis using permuted STR genotypes as a negative control to evaluate p-value inflation, and discarded traits showing such inflation. We used  $p < 10^{-6}$  as a genome-wide significance threshold commensurate to the size of the *A. thaliana* genome and the data at hand. For flowering time phenotypes we used a more stringent  $p < 10^{-10}$  threshold, as these phenotypes showed somewhat shifted p-value distributions (which were nonetheless inconsistent with inflation, according to negative controls). We identified potentially confounding SNP associations using the <https://gwas.gmi.oeaw.ac.at/#/study/1/phenotypes> resource, using the criterion that a SNP association must have a  $p \leq 10^{-4}$  and be within roughly 100KB of the STR to be considered. We fit models including SNPs as fixed effects as before, and performed model selection using AICc<sup>69</sup>. Additional details about association analyses are in the Supplementary Note.

## Data and code availability

MIP sequencing data are available in FASTQ format at the Sequence Read Archive, under project number PRJNA388228. Analysis scripts are provided at [https://osf.io/5jm2c/?view\\_only=324129c85b3448a8bd6086263345c7b0](https://osf.io/5jm2c/?view_only=324129c85b3448a8bd6086263345c7b0), along with data sufficient to reproduce analyses.

## ACKNOWLEDGMENTS

We thank Keisha Carlson, Alberto Rivera, and members of the Queitsch lab for technical assistance and important conversations. We thank Evan Boyle, Choli Lee, Matthew Snyder, and Jay Shendure for assistance and advice concerning MIP design and use. We thank the Dunham Lab and the Fields Lab for access to and help with sequencing instruments. We thank UW Genome Sciences Information Technology for

Press *et al.* (2017)

Massive variation of STRs in *A. thaliana*

- 1 high-performance computing resources. This work was supported in part by NIH New
- 2 Innovator Award DP2OD008371 to CQ.

Press *et al.* (2017)

Massive variation of STRs in *A. thaliana*

## References

1. Acuna-Hidalgo, R., Veltman, J. A. & Hoischen, A. New insights into the generation and role of de novo mutations in health and disease. *Genome Biol.* **17**, 241 (2016).
2. Sun, J. X. *et al.* A direct characterization of human mutation based on microsatellites. *Nat. Genet.* **44**, 1161–5 (2012).
3. Gymrek, M., Willems, T., Erlich, Y. & Reich, D. E. A framework to interpret short tandem repeat variation in humans. *bioRxiv* 92734 (2016). doi:10.1101/092734
4. Willems, T. *et al.* Population-Scale Sequencing Data Enable Precise Estimates of Y-STR Mutation Rates. *Am. J. Hum. Genet.* **98**, 919–933 (2016).
5. Payseur, B. A., Jing, P. & Haasl, R. J. A Genomic Portrait of Human Microsatellite Variation. *Mol. Biol. Evol.* **28**, 303–312 (2011).
6. Harpak, A., Bhaskar, A. & Pritchard, J. K. Mutation Rate Variation is a Primary Determinant of the Distribution of Allele Frequencies in Humans. *PLOS Genet.* **12**, e1006489 (2016).
7. Haasl, R. J. & Payseur, B. A. The Number of Alleles at a Microsatellite Defines the Allele Frequency Spectrum and Facilitates Fast Accurate Estimation of  $\theta$ . *Mol. Biol. Evol.* **27**, 2702–2715 (2010).
8. Yang, J. *et al.* Common SNPs explain a large proportion of the heritability for human height. *Nat. Genet.* **42**, 565–9 (2010).
9. Press, M. O., Carlson, K. D. & Queitsch, C. The overdue promise of short tandem repeat variation for heritability. *Trends Genet.* **30**, 504–512 (2014).
10. Fondon, J. W., Hammock, E. A. D., Hannan, A. J. & King, D. G. Simple sequence repeats: genetic modulators of brain function and behavior. *Trends Neurosci.* **31**, 328–34 (2008).

Press *et al.* (2017)

Massive variation of STRs in *A. thaliana*

11. Hannan, A. J. Tandem repeat polymorphisms: modulators of disease susceptibility and candidates for ‘missing heritability’. *Trends Genet.* **26**, 59–65 (2010).
12. Carlson, K. D. *et al.* MIPSTR: A method for multiplex genotyping of germline and somatic STR variation across many individuals. *Genome Res.* **125**, 750–761 (2015).
13. Willems, T., Zielinski, D., Gordon, A., Gymrek, M. & Erlich, Y. Genome-wide profiling of heritable and de novo STR variations. *bioRxiv* 77727 (2016). doi:10.1101/077727
14. Highnam, G. *et al.* Accurate human microsatellite genotypes from high-throughput resequencing data using informed error profiles. *Nucleic Acids Res.* **41**, e32 (2013).
15. Gymrek, M. *et al.* Abundant contribution of short tandem repeats to gene expression variation in humans. *Nat. Genet.* **48**, 22–29 (2015).
16. Moxon, E. R., Rainey, P. B., Nowak, M. A. & Lenski, R. E. Adaptive evolution of highly mutable loci in pathogenic bacteria. *Curr. Biol.* **4**, 24–33 (1994).
17. King, D. G. Indirect selection of implicit mutation protocols. *Ann. N. Y. Acad. Sci.* **1267**, 45–52 (2012).
18. Gemayel, R., Vences, M. D., Legendre, M. & Verstrepen, K. J. Variable tandem repeats accelerate evolution of coding and regulatory sequences. *Annu. Rev. Genet.* **44**, 445–77 (2010).
19. Mularoni, L., Ledda, A., Toll-Riera, M. & Albà, M. M. Natural selection drives the accumulation of amino acid tandem repeats in human proteins. *Genome Res.* **20**, 745–54 (2010).
20. Yu, F. *et al.* Positive selection of a pre-expansion CAG repeat of the human SCA2 gene. *PLoS Genet.* **1**, e41 (2005).

Press *et al.* (2017)

Massive variation of STRs in *A. thaliana*

- 1 21. Sawaya, S. M., Lennon, D., Buschiazso, E., Gemmell, N. & Minin, V. N. Measuring  
2 microsatellite conservation in mammalian evolution with a phylogenetic birth-death model.  
3 *Genome Biol. Evol.* **4**, 636–47 (2012).
- 4 22. Nordborg, M. *et al.* The pattern of polymorphism in *Arabidopsis thaliana*. *PLoS Biol.* **3**,  
5 e196 (2005).
- 6 23. Alonso-Blanco, C. *et al.* 1,135 Genomes Reveal the Global Pattern of Polymorphism in  
7 *Arabidopsis thaliana*. *Cell* **0**, (2016).
- 8 24. Usdin, K. The biological effects of simple tandem repeats: Lessons from the repeat  
9 expansion diseases. *Genome Res.* **18**, 1011–1019 (2008).
- 10 25. Sureshkumar, S. *et al.* A genetic defect caused by a triplet repeat expansion in  
11 *Arabidopsis thaliana*. *Science* **323**, 1060–3 (2009).
- 12 26. Li, Y.-C., Korol, A. B., Fahima, T. & Nevo, E. Microsatellites Within Genes: Structure,  
13 Function, and Evolution. *Mol. Biol. Evol.* **21**, 991–1007 (2004).
- 14 27. Ranum, L. P. W. & Day, J. W. Dominantly inherited, non-coding microsatellite  
15 expansion disorders. *Curr. Opin. Genet. Dev.* **12**, 266–271 (2002).
- 16 28. Jackson, R. J. Cytoplasmic regulation of mRNA function: The importance of the 3'  
17 untranslated region. *Cell* **74**, 9–14 (1993).
- 18 29. Haasl, R. J. & Payseur, B. A. Microsatellites as targets of natural selection. *Mol. Biol.*  
19 *Evol.* **30**, 285–98 (2013).
- 20 30. Huntley, M. A. & Clark, A. G. Evolutionary Analysis of Amino Acid Repeats across the  
21 Genomes of 12 *Drosophila* Species. *Mol. Biol. Evol.* **24**, 2598–2609 (2007).



Press *et al.* (2017)

Massive variation of STRs in *A. thaliana*

- 1 31. Schlötterer, C., Kauer, M. & Dieringer, D. Allele Excess at Neutrally Evolving  
2 Microsatellites and the Implications for Tests of Neutrality. *Proc. Biol. Sci.* **271**, 869–874  
3 (2004).
- 4 32. Legendre, M., Pochet, N., Pak, T. & Verstrepen, K. J. Sequence-based estimation of  
5 minisatellite and microsatellite repeat variability. *Genome Res.* **17**, 1787–96 (2007).
- 6 33. Eckert, K. A. & Hile, S. E. Every microsatellite is different: Intrinsic DNA features  
7 dictate mutagenesis of common microsatellites present in the human genome. *Mol. Carcinog.*  
8 **48**, 379–88 (2009).
- 9 34. Karlin, S., Brocchieri, L., Bergman, A., Mrazek, J. & Gentles, A. J. Amino acid runs in  
10 eukaryotic proteomes and disease associations. *Proc. Natl. Acad. Sci. U. S. A.* **99**, 333–8  
11 (2002).
- 12 35. Alexandre, C. M. *et al.* Regulatory DNA in *A. thaliana* can tolerate high levels of  
13 sequence divergence. *bioRxiv* 104323 (2017). doi:10.1101/104323
- 14 36. Breuer, C. *et al.* BIN4, a Novel Component of the Plant DNA Topoisomerase VI  
15 Complex, Is Required for Endoreduplication in Arabidopsis. *Plant Cell* **19**, 3655–3668  
16 (2007).
- 17 37. Xu, G., Ma, H., Nei, M. & Kong, H. Evolution of F-box genes in plants: Different modes  
18 of sequence divergence and their relationships with functional diversification. *Proc. Natl.*  
19 *Acad. Sci.* **106**, 835–840 (2009).
- 20 38. Clark, R. M. *et al.* Common Sequence Polymorphisms Shaping Genetic Diversity in  
21 Arabidopsis thaliana. *Science* **317**, 338–342 (2007).
- 22 39. Shen, X. *et al.* Natural CMT2 Variation Is Associated With Genome-Wide Methylation  
23 Changes and Temperature Seasonality. *PLOS Genet.* **10**, e1004842 (2014).

Press *et al.* (2017) Massive variation of STRs in *A. thaliana*

- 1 40. Sawaya, S. *et al.* Microsatellite tandem repeats are abundant in human promoters and are  
2 associated with regulatory elements. *PloS One* **8**, e54710 (2013).
- 3 41. Vences, M. D., Legendre, M., Caldara, M., Hagihara, M. & Verstrepen, K. J. Unstable  
4 tandem repeats in promoters confer transcriptional evolvability. *Science* **324**, 1213–6 (2009).
- 5 42. Payseur, B. A., Place, M. & Weber, J. L. Linkage disequilibrium between STRPs and  
6 SNPs across the human genome. *Am. J. Hum. Genet.* **82**, 1039–50 (2008).
- 7 43. Willems, T. F., Gymrek, M., Highnam, G., Mittelman, D. & Erlich, Y. The landscape of  
8 human STR variation. *Genome Res.* gr.177774.114– (2014). doi:10.1101/gr.177774.114
- 9 44. Sawaya, S., Jones, M. & Keller, M. *Linkage disequilibrium between single nucleotide*  
10 *polymorphisms and hypermutable loci*. 20909 (Cold Spring Harbor Labs Journals, 2015).
- 11 45. Atwell, S. *et al.* Genome-wide association study of 107 phenotypes in Arabidopsis  
12 thaliana inbred lines. *Nature* **465**, 627–31 (2010).
- 13 46. Kawakatsu, T. *et al.* Epigenomic Diversity in a Global Collection of Arabidopsis thaliana  
14 Accessions. *Cell* **166**, 492–505 (2016).
- 15 47. Antignani, V. *et al.* Recruitment of PLANT U-BOX13 and the PI4Kβ1/β2  
16 Phosphatidylinositol-4 Kinases by the Small GTPase RabA4B Plays Important Roles during  
17 Salicylic Acid-Mediated Plant Defense Signaling in Arabidopsis. *Plant Cell* **27**, 243–261  
18 (2015).
- 19 48. Tian, D., Araki, H., Stahl, E., Bergelson, J. & Kreitman, M. Signature of balancing  
20 selection in Arabidopsis. *Proc. Natl. Acad. Sci.* **99**, 11525–11530 (2002).
- 21 49. Karasov, T. L. *et al.* The long-term maintenance of a resistance polymorphism through  
22 diffuse interactions. *Nature* **512**, 436–440 (2014).
- 23 50. Lynch, M. The rate of polygenic mutation. *Genet. Res.* **51**, 137–148 (1988).

Press *et al.* (2017)

Massive variation of STRs in *A. thaliana*

- 1 51. Rival, P. *et al.* The conserved PFT1 tandem repeat is crucial for proper flowering in  
2 *Arabidopsis thaliana*. *Genetics* **198**, 747–754 (2014).
- 3 52. Undurraga, S. F. *et al.* Background-dependent effects of polyglutamine variation in the  
4 *Arabidopsis thaliana* gene ELF3. *Proc. Natl. Acad. Sci. U. S. A.* **109**, 19363–19367 (2012).
- 5 53. Press, M. O. & Queitsch, C. Variability in a Short Tandem Repeat Mediates Complex  
6 Epistatic Interactions in *Arabidopsis thaliana*. *Genetics* genetics.116.193359 (2016).  
7 doi:10.1534/genetics.116.193359
- 8 54. Cummings, B. B. *et al.* Improving genetic diagnosis in Mendelian disease with  
9 transcriptome sequencing. *Sci. Transl. Med.* **9**, eaal5209 (2017).
- 10 55. Nellore, A. *et al.* Human splicing diversity and the extent of unannotated splice junctions  
11 across human RNA-seq samples on the Sequence Read Archive. *Genome Biol.* **17**, 266  
12 (2016).
- 13 56. Benson, G. Tandem repeats finder: a program to analyze DNA sequences. *Nucleic Acids*  
14 *Res.* **27**, 573–580 (1999).
- 15 57. Boyle, E. A., O’Roak, B. J., Martin, B. K., Kumar, A. & Shendure, J. MIPgen: optimized  
16 modeling and design of molecular inversion probes for targeted resequencing. *Bioinformatics*  
17 **30**, 2670–2672 (2014).
- 18 58. Gan, X. *et al.* Multiple reference genomes and transcriptomes for *Arabidopsis thaliana*.  
19 *Nature* **477**, 419–23 (2011).
- 20 59. Hiatt, J. B., Pritchard, C. C., Salipante, S. J., O’Roak, B. J. & Shendure, J. Single  
21 molecule molecular inversion probes for targeted, high-accuracy detection of low-frequency  
22 variation. *Genome Res.* **23**, 843–54 (2013).

Press *et al.* (2017) Massive variation of STRs in *A. thaliana*

- 1 60. Cheng, C.-Y. *et al.* Araport11: a complete reannotation of the Arabidopsis thaliana  
2 reference genome. *Plant J. Cell Mol. Biol.* **89**, 789–804 (2017).
- 3 61. Sullivan, A. M. *et al.* Mapping and Dynamics of Regulatory DNA and Transcription  
4 Factor Networks in *A. thaliana*. *Cell Rep.* **8**, 2015–30 (2014).
- 5 62. R Core Team. *R: A Language and Environment for Statistical Computing*. (R Foundation  
6 for Statistical Computing, 2016).
- 7 63. Alonso, J. M. *et al.* Genome-wide insertional mutagenesis of Arabidopsis thaliana.  
8 *Science* **301**, 653–7 (2003).
- 9 64. Zaykin, D. V., Pudovkin, A. & Weir, B. S. Correlation-Based Inference for Linkage  
10 Disequilibrium With Multiple Alleles. *Genetics* **180**, 533–545 (2008).
- 11 65. Horton, M. W. *et al.* Genome-wide patterns of genetic variation in worldwide  
12 Arabidopsis thaliana accessions from the RegMap panel. *Nat. Genet.* **44**, 212–216 (2012).
- 13 66. Karatzoglou, A., Smola, A. & Hornik, K. *kernlab: Kernel-Based Machine Learning Lab*.  
14 (2016).
- 15 67. Shabalin, A. A. Matrix eQTL: ultra fast eQTL analysis via large matrix operations.  
16 *Bioinformatics* **28**, 1353–1358 (2012).
- 17 68. Therneau, T. M. *coxme: Mixed Effects Cox Models*. (2015).
- 18 69. Hurvich, C. M. & Tsai, C.-L. Regression and time series model selection in small  
19 samples. *Biometrika* **76**, 297–307 (1989).

20
